# Supplementary material
Source: publisher site journal article supplement (https://www.dovepress.com/article/320088)
Supplement: Supplementary file 4 [file 22_Jul_2021_Supplementary_Figure_4.pdf › 22_Jul_2021_Supplementary_Figure_4.pdf]

A

KEGG pathway annotation

Cellular Processes

- Transport and Catabolism
- Cell Motility
- Cell Growth and Death
- Cell Communication

Environmental Information Processing

- Signaling Molecules and Interaction
- Signal Transduction
- Membrane Transport

Genetic Information Processing

- Translation
- Transcription
- Replication and Repair
- Folding, Sorting and Degradation

Human Diseases

- Neurodegenerative Diseases
- Metabolic Diseases
- Infectious Diseases
- Immune System Diseases
- Cardiovascular Diseases
- Cancers

Metabolism

- Xenobiotics Biodegradation and Metabolism
- Nucleotide Metabolism
- Metabolism of Terpenoids and Polyketides
- Metabolism of Other Amino Acids
- Metabolism of Cofactors and Vitamins
- Lipid Metabolism
- Glycan Biosynthesis and Metabolism
- Enzyme Families
- Energy Metabolism
- Carbohydrate Metabolism
- Biosynthesis of Other Secondary Metabolites
- Amino Acid Metabolism

Organismal Systems

- Sensory System
- Nervous System
- Immune System
- Excretory System
- Environmental Adaptation
- Endocrine System
- Digestive System
- Circulatory System

Unclassified

- Poorly Characterized
- Metabolism
- Genetic Information Processing
- Cellular Processes and Signaling

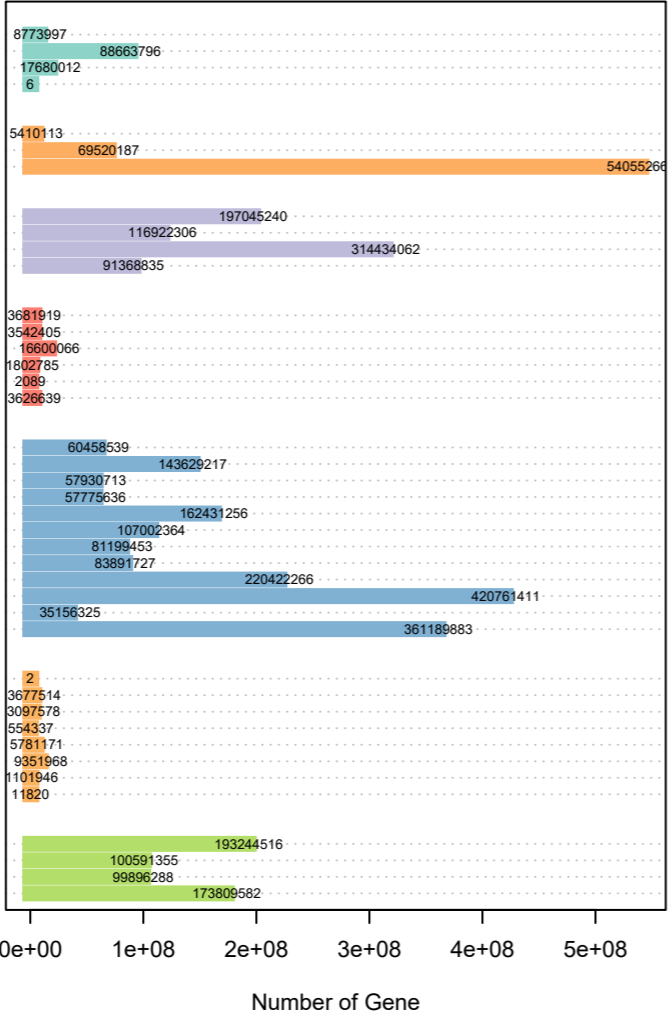

B

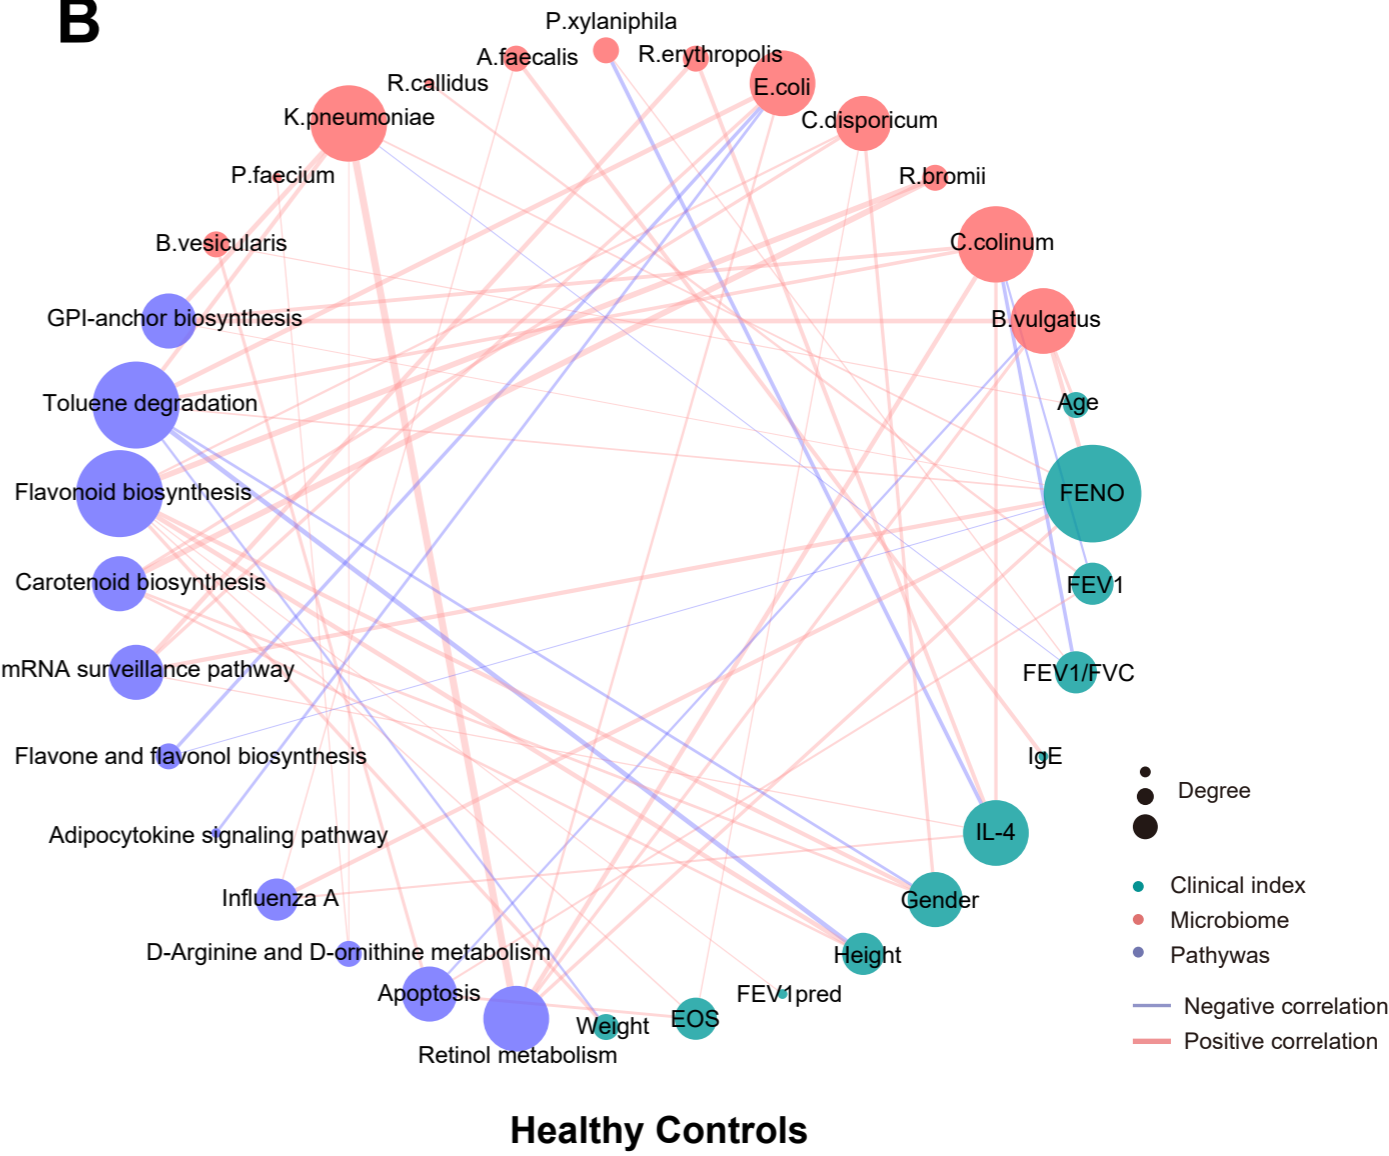

Healthy Controls
