# Supplementary material
Source: publisher site journal article supplement (https://www.dovepress.com/article/320088)

**A**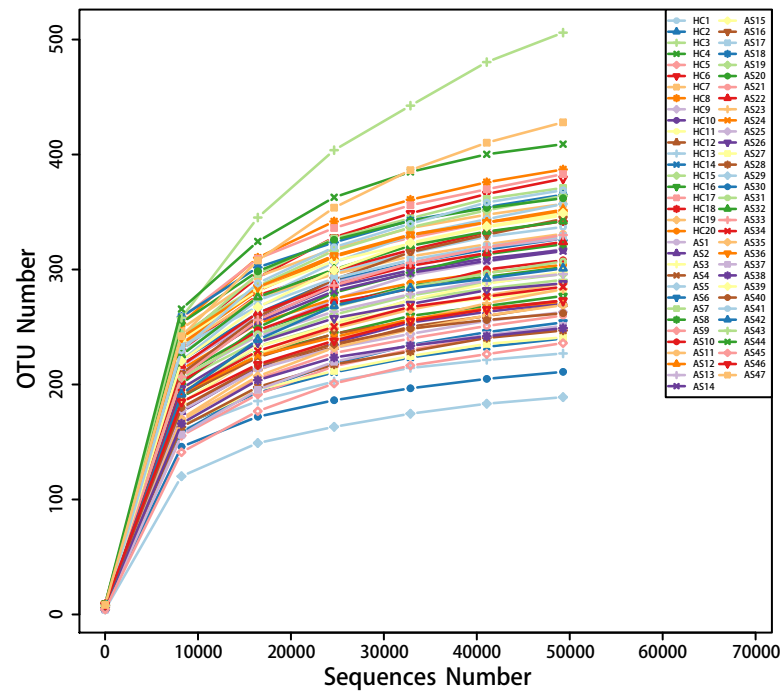**B**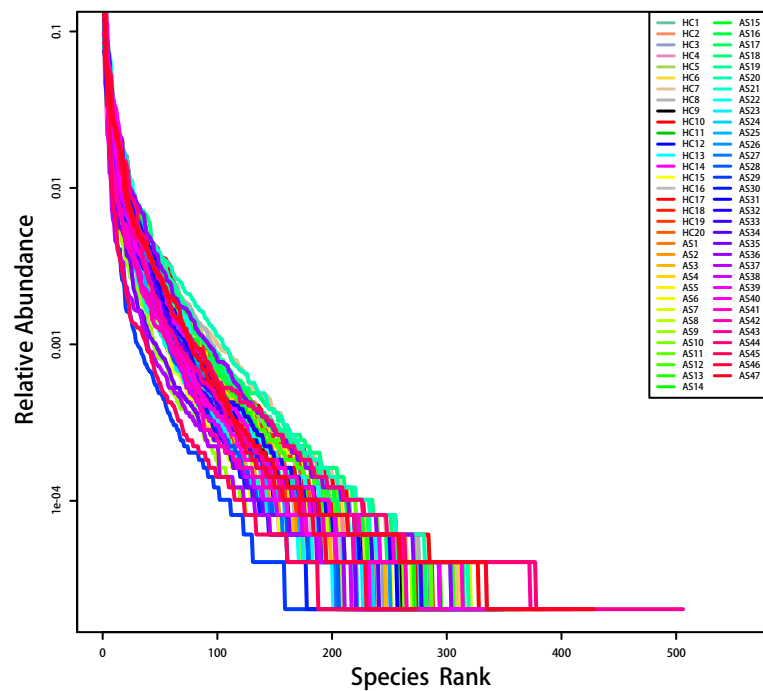**C**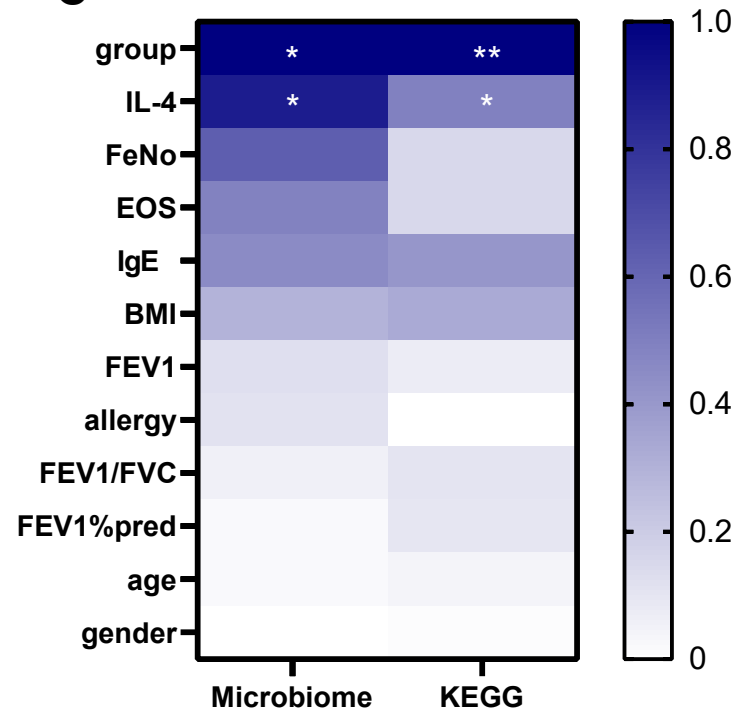

Supplement: Supplementary file 1 [file 22_Jul_2021_Supplementary_Figure_1.pdf › 22_Jul_2021_Supplementary_Figure_1.pdf]

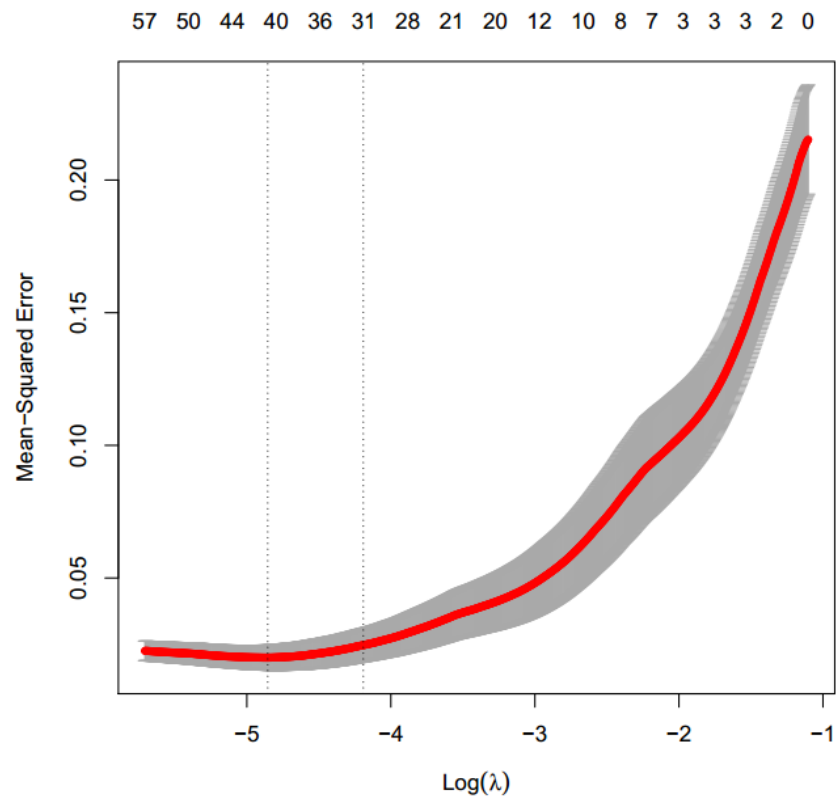

**A**

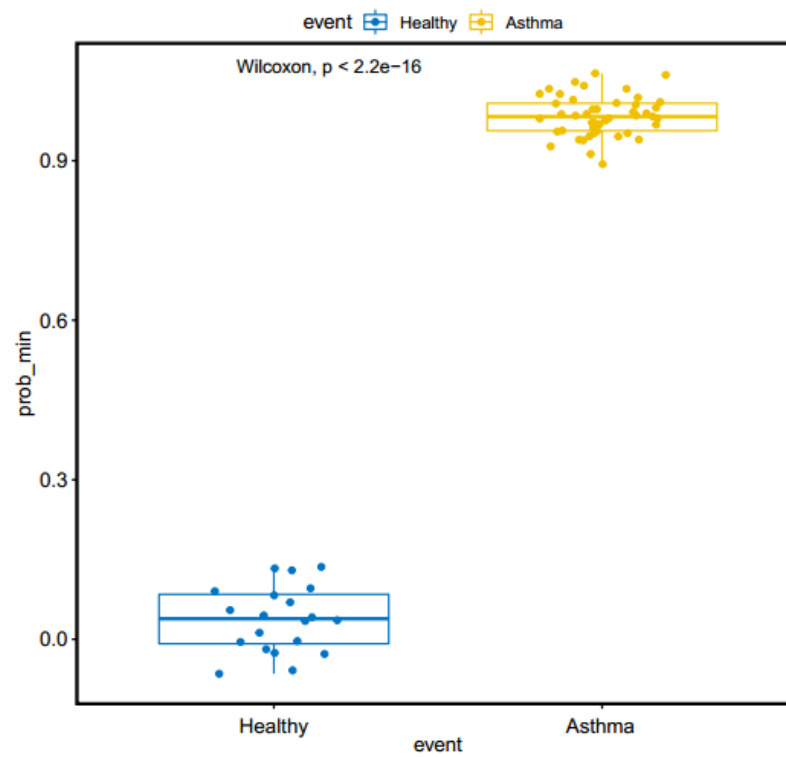

**B**

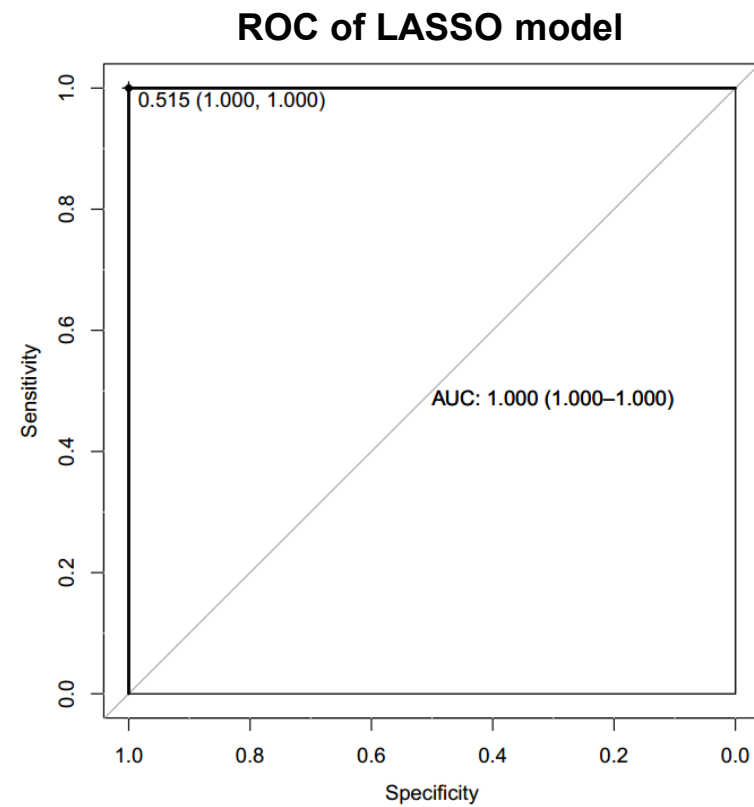

**C**

Supplement: Supplementary file 2 [file 22_Jul_2021_Supplementary_Figure_2.pdf › 22_Jul_2021_Supplementary_Figure_2.pdf]

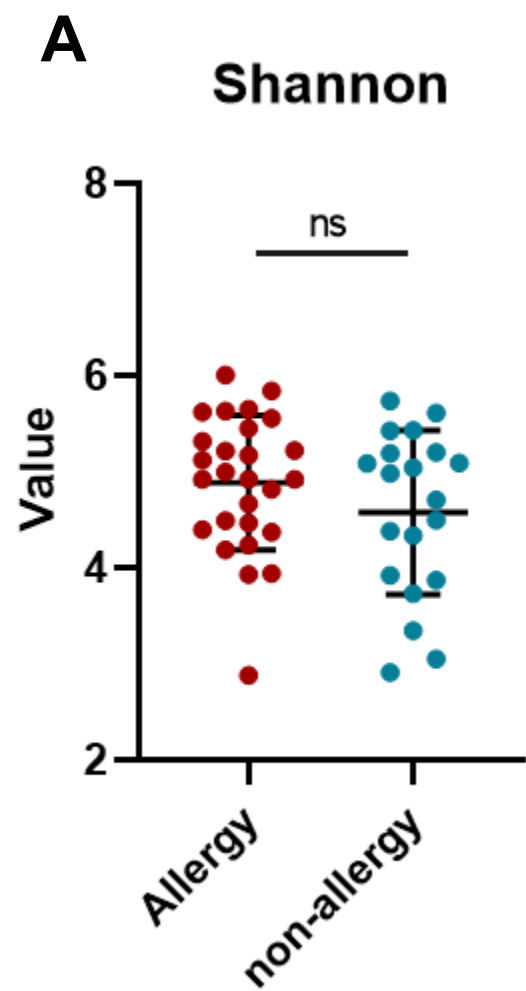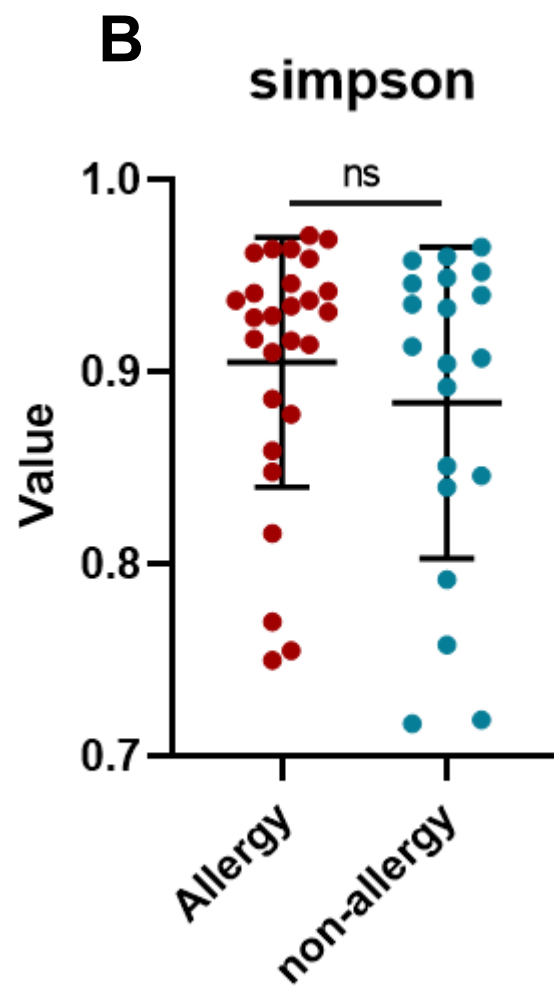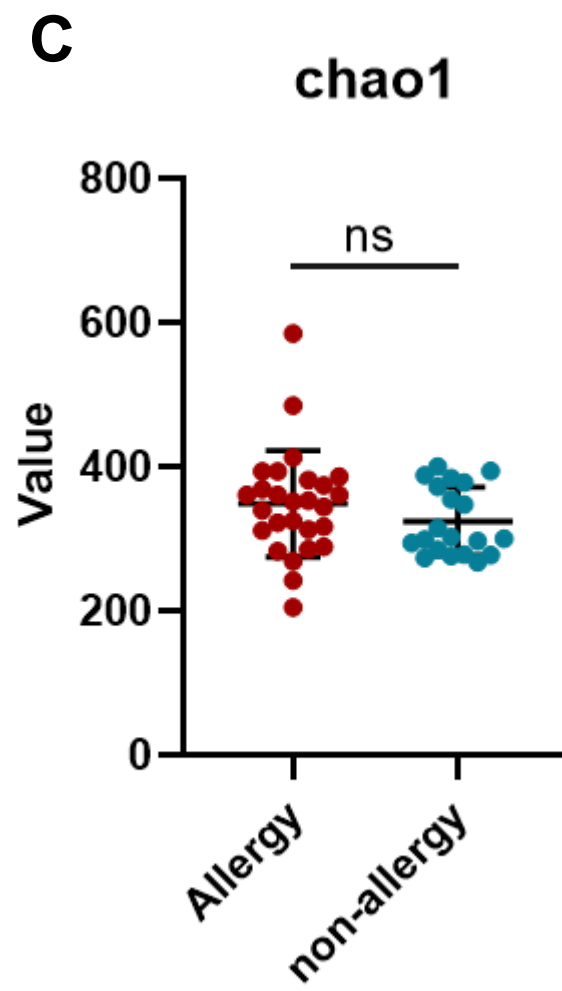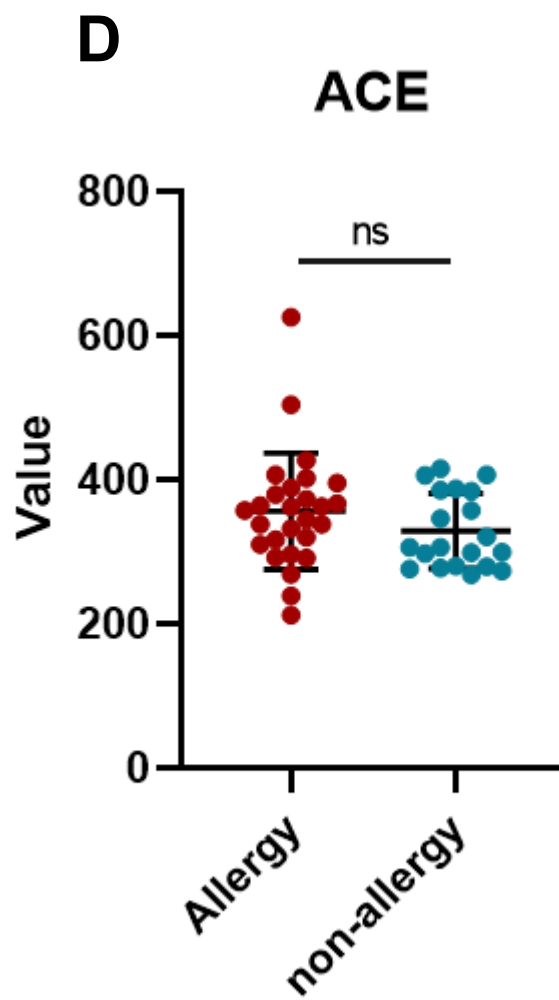

Supplement: Supplementary file 3 [file 22_Jul_2021_Supplementary_Figure_3.pdf › 22_Jul_2021_Supplementary_Figure_3.pdf]
